# Supplementary material for: Exploring the potential of the ammine complexes M(NH3)n+ (M = Zr, Re) to activate NH3
Source: Royal Society of Chemistry journal article supplement (doi:10.1039/d1nj05386h), 2022-01-01
Supplement: d1nj05386h1.pdf [file d1nj05386h1.pdf]

## Electronic Supplementary Material (ESI) for New Journal of Chemistry

### Supporting Information

#### Exploring the potential of the ammine complexes $M(\text{NH}_3)_n^+$ ( $M = \text{Zr}, \text{Re}$ ) to activate $\text{NH}_3$

Alejandro Avilés\* and Fernando Colmenares\*. Departamento de Física y Química Teórica, Facultad de Química. Universidad Nacional Autónoma de México. CDMX 04510, México.

#### Contents

Tables S1 and S2. Geometrical parameters obtained from CASSCF calculations for the stationary states discussed herein.

Figure S1. Plots for the crossing points between electronic states of different spin multiplicity.

Table S3. Cartesian coordinates for all the structures appearing in figures and tables.

**Table S1.** Geometrical parameters for the  $M(\text{NH}_3)_n^+$  complexes.

| Complex                      | Spin Multiplicity | Geometry          | M – N distances (Å)      | N – M – N Angles (degrees)        |
|------------------------------|-------------------|-------------------|--------------------------|-----------------------------------|
| $\text{Zr}(\text{NH}_3)^+$   | 4                 | Linear            | 2.32                     |                                   |
| $\text{Zr}(\text{NH}_3)^+$   | 2                 | Linear            | 2.28                     |                                   |
| $\text{Zr}(\text{NH}_3)_2^+$ | 4                 | Linear            | 2.36                     | 179.6                             |
| $\text{Zr}(\text{NH}_3)_3^+$ | 4                 | Dist. trigonal    | 2.40, 2.44               | 165.5, 113.8                      |
| $\text{Zr}(\text{NH}_3)_4^+$ | 4                 | Square planar     | 2.43                     | 95.0, 86.6                        |
| $\text{Zr}(\text{NH}_3)_5^+$ | 4                 | Square pyramid    | 2.44                     | 90.0 (equatorial)<br>87.1 (axial) |
| $\text{Zr}(\text{NH}_3)_6^+$ | 4                 | Octahedral        | 2.43 (eq.)<br>2.42 (ax.) | 86.9 (eq.)<br>89.7 (ax.)          |
| $\text{Zr}(\text{NH}_3)_7^+$ | 4                 | Capped octahedral | 2.49 (eq.) 2.47 (ax.)    | 77.9 (eq.)<br>90.2 (ax.)          |
| $\text{Re}(\text{NH}_3)^+$   | 7                 | Linear            | 2.46                     |                                   |
| $\text{Re}(\text{NH}_3)^+$   | 5                 | Linear            | 2.11                     |                                   |
| $\text{Re}(\text{NH}_3)_2^+$ | 7                 | Bent              | 2.47                     | 91.4                              |
| $\text{Re}(\text{NH}_3)_2^+$ | 5                 | Linear            | 2.16                     | 179.7                             |
| $\text{Re}(\text{NH}_3)_3^+$ | 5                 | Dist. T-shaped    | 2.20, 2.60               | 106.4, 82.1                       |

**Table S2.** Some geometrical parameters for the located stationary points.

| Ion                                                                                           | Spin Multiplicity | Geometry                     | Distance (Å)                            |                                |             | Angle (degrees)                         |                                         |           |
|-----------------------------------------------------------------------------------------------|-------------------|------------------------------|-----------------------------------------|--------------------------------|-------------|-----------------------------------------|-----------------------------------------|-----------|
|                                                                                               |                   |                              | M – N(H <sub>3</sub> )                  | M – N(H <sub>2</sub> )         | M – H       | N(H <sub>3</sub> )-M-N(H <sub>3</sub> ) | N(H <sub>3</sub> )-M-N(H <sub>2</sub> ) | H – M – H |
| T <sub>1</sub>                                                                                | 4                 | Bent                         |                                         | 2.50                           | 1.83        |                                         | 55.0<br>(∠H – Zr N)                     |           |
|                                                                                               | 2                 | Bent                         |                                         | 2.06                           | 2.06        |                                         | 40.0<br>(∠H – Zr N)                     |           |
| [H – Zr – NH <sub>2</sub> ] <sup>+</sup>                                                      | 4                 | Bent                         |                                         | 2.37                           | 1.86        |                                         | 120.5<br>(∠H – Zr N)                    |           |
|                                                                                               | 2                 | Bent                         |                                         | 1.96                           | 1.85        |                                         | 100.6<br>(∠H – Zr N)                    |           |
| T <sub>2</sub>                                                                                | 4                 | Dist. square pyramid         |                                         | 2.25                           | 1.85, 2.00  |                                         | 119.1, 43.0<br>(∠H – Zr N)              | 88.0      |
|                                                                                               | 2                 | Dist. square pyramid         |                                         | 1.85                           | 1.84, 1.92  |                                         | 95.2, 55.0<br>(∠H – Zr N)               | 69.8      |
| [(H) <sub>2</sub> ... Zr – NH] <sup>+</sup>                                                   | 4                 | Linear                       |                                         | 2.00<br>(R <sub>Zr-NH</sub> )  | 2.83, 2.84  |                                         | 172.2, 171.4<br>(∠H – Zr N)             | 112.9     |
| T <sub>3</sub>                                                                                | 4                 | Dist. trigonal               |                                         | 2.56<br>(R <sub>Zr-NH</sub> )  | 1.97, 1.97  |                                         | 165.4, 165.5<br>(∠H – Zr N)             | 29.0      |
| [(H <sub>2</sub> ) ... Zr – NH] <sup>+</sup>                                                  | 4                 | Linear                       |                                         | 2.002<br>(R <sub>Zr-NH</sub> ) | 2.83, 2.84  |                                         | 172.2, 171.4<br>(∠H – Zr N)             | 16.3      |
| [(H <sub>2</sub> ) ... Zr – NH] <sup>+</sup>                                                  | 2                 | Bent                         |                                         | 1.81<br>(R <sub>Zr-NH</sub> )  | 2.37, 2.38  |                                         | 95.5, 95.0<br>(∠H – Zr N)               | 19.6      |
| Zr – NH <sup>+</sup>                                                                          | 4                 | Linear                       |                                         | 1.97<br>(R <sub>Zr-NH</sub> )  |             |                                         |                                         |           |
| Zr – NH <sup>+</sup>                                                                          |                   | Linear                       |                                         | 1.81<br>(R <sub>Zr-NH</sub> )  |             |                                         |                                         |           |
| H – Zr(NH <sub>3</sub> ) <sub>7</sub> <sup>+</sup>                                            | 4,2               | Square antiprismatic         | 2.45                                    |                                | 1.95        | 74.04                                   |                                         |           |
| [H – Zr(NH <sub>3</sub> ) <sub>7</sub> ] <sup>+</sup> ... NH <sub>2</sub>                     | 4                 | -                            | 2.44                                    | 3.74                           | 1.96        | 76.65                                   | 58.2                                    |           |
| TS <sub>4</sub>                                                                               | 4                 | -                            | 2.49                                    | 2.70                           | 1.97        | 74.20                                   | 63.1                                    |           |
| Zr(NH <sub>3</sub> ) <sub>6</sub> (NH <sub>2</sub> ) <sup>+</sup> ... NH <sub>3</sub>         | 4                 | -                            | 2.39, 3.57                              | 2.10                           | 12.0        | 79.1, 62.2                              | 95.1, 69.5                              |           |
| Zr(NH <sub>3</sub> ) <sub>6</sub> (NH <sub>2</sub> ) <sup>+</sup>                             | 4                 | Dist. Pentagonal Bipyramidal | 2.44 (eq.)<br>2.39 (ax.)                | 2.092                          | 12.0        | 71.8 (eq.)<br>168.0 (ax.)               | 75.2 (eq.)<br>95.6 (ax.)                |           |
| H <sub>3</sub> N ... [H – Zr (NH <sub>3</sub> ) <sub>6</sub> (NH <sub>2</sub> )] <sup>+</sup> | 2                 | -                            | 2.45, 4.18                              | 2.18                           | 2.00        | 112.1, 47.2                             | 77.9                                    |           |
| TS <sub>4</sub>                                                                               | 2                 | -                            | 2.44, 4.18                              | 2.14, 2.26                     | 2.18, 2.15  | 73.1                                    | 78.2, 100.8                             | 29.6      |
| Zr(NH <sub>3</sub> ) <sub>5</sub> (NH <sub>2</sub> ) <sub>2</sub> <sup>+</sup>                | 2                 | Dist. Capped octahedra       | 2.45 (eq.),<br>2.43(ax.),<br>2.45 (ax.) | 2.14, 2.13                     | 10.00, 9.64 | 77.6                                    | 81.8                                    |           |
| TS <sub>5</sub>                                                                               | 5                 | Dist. See-saw                | 2.19                                    | 2.26                           | 1.81        | 172.7                                   | 97.4                                    |           |
| H – Re(NH <sub>3</sub> ) <sub>2</sub> (NH <sub>2</sub> ) <sup>+</sup>                         | 5                 | Square planar                | 2.17                                    | 2.04                           | 1.78        | 179.4                                   | 90.0                                    |           |

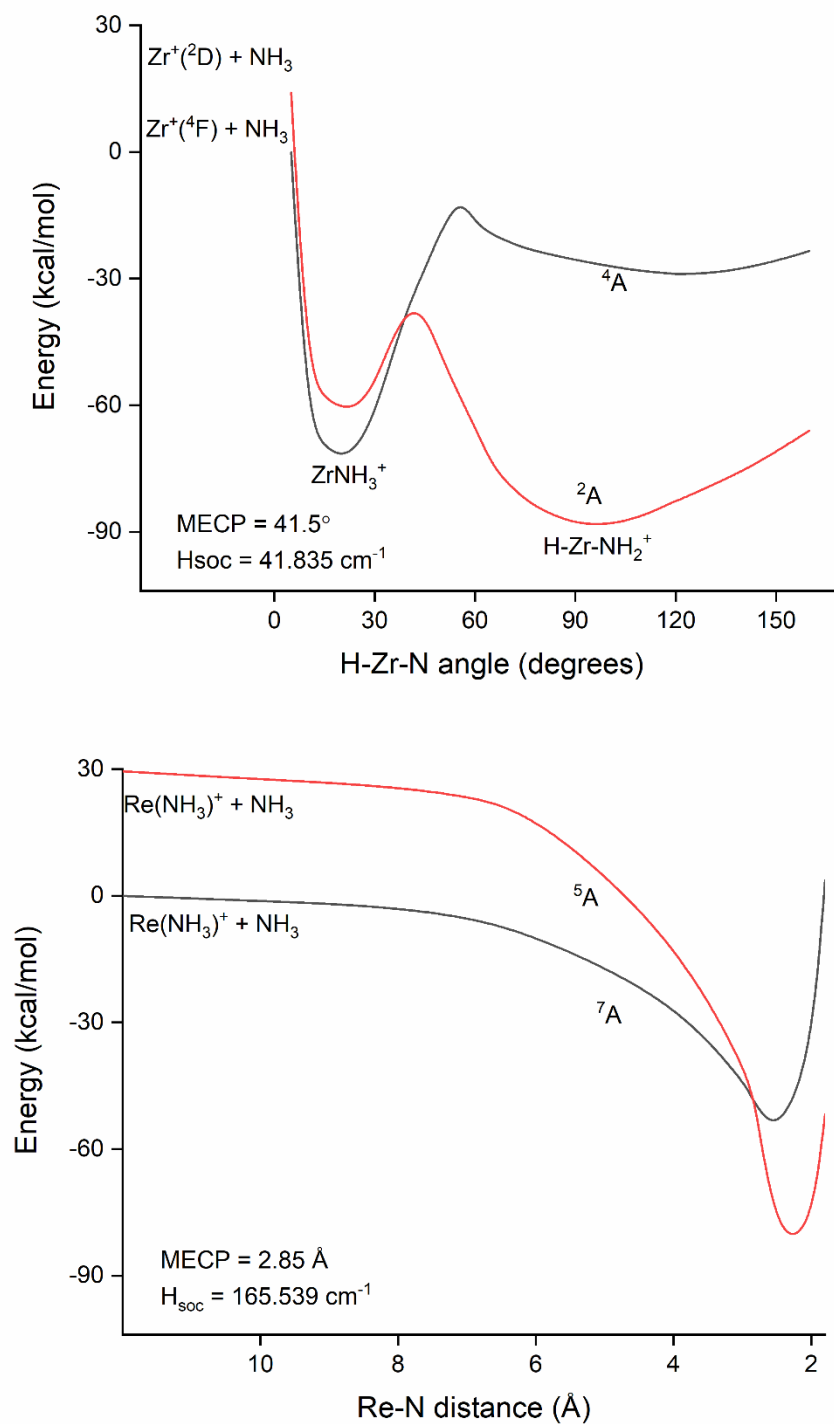

**Fig S1** Graphs showing the crossing points between electronic states of different spin multiplicity. Quartet and doublet electronic states emerging from the reactants  $Zr^+ + NH_3$  (top). Septuplet and quintuplet channels that evolve from the reaction  $Re(NH_3)^+ + NH_3$  (bottom).

**Table S3.** Cartesian coordinates for all the structures appearing in figures and tables.

Figure 1

Structure:  $\text{Zr}(\text{NH}_3)^+$  ( $^4\text{A}$ )

CASPT2 Energy (Ha) = -102.60696239

Imaginary Frequencies = 0

|    | x          | y          | z           |
|----|------------|------------|-------------|
| Zr | 2.05180406 | 3.44533493 | -1.25990686 |
| N  | 0.96229725 | 1.50847403 | -0.57920306 |
| H  | 0.65887589 | 1.54479491 | 0.47178670  |
| H  | 1.57116387 | 0.63403310 | -0.66895366 |
| H  | 0.06669196 | 1.31232903 | -1.12905407 |

Structure:  $\text{Zr}(\text{NH}_3)^+$  ( $^2\text{A}$ )

CASPT2 Energy (Ha) = -102.59772204

Imaginary Frequencies = 0

|    | x          | y          | z           |
|----|------------|------------|-------------|
| Zr | 1.99017461 | 3.46197140 | -1.22128202 |
| N  | 0.96850924 | 1.51350745 | -0.59449252 |
| H  | 0.61584742 | 1.47962733 | 0.44698074  |
| H  | 1.58033996 | 0.60523527 | -0.70006799 |
| H  | 0.06596179 | 1.29462456 | -1.18646918 |

Structure:  $^4\text{T}_1$  ( $^4\text{A}$ )

CASPT2 Energy (Ha) = -102.51524744

Imaginary Frequencies = 1

|    | x          | y          | z           |
|----|------------|------------|-------------|
| Zr | 1.52337206 | 3.64267453 | -0.51052173 |
| N  | 0.77184645 | 1.30754741 | -1.03547622 |
| H  | 1.79250262 | 2.18206109 | 0.56888951  |
| H  | 0.98185271 | 0.47624762 | -0.31844755 |
| H  | 0.22125918 | 0.81643533 | -1.88977499 |

Structure:  $^2\text{T}_1$  ( $^2\text{A}$ )

CASPT2 Energy (Ha) = -102.56036011

Imaginary Frequencies = 1

|    | x          | y          | z           |
|----|------------|------------|-------------|
| Zr | 1.81965940 | 3.31608563 | -0.87146013 |
| N  | 1.01325934 | 1.41527016 | -0.91551147 |
| H  | 0.84826716 | 1.97961857 | 0.36942821  |

H 1.53718991 0.47994470 -0.68360103  
H -0.01754277 1.14404694 -1.17418655

Structure: H-Zr-NH<sub>2</sub><sup>+</sup> (<sup>4</sup>A)

CASPT2 Energy (Ha) = -102.54691616

Imaginary Frequencies = 0

|    | x           | y          | z           |
|----|-------------|------------|-------------|
| Zr | 1.61794017  | 3.09828922 | -0.35502113 |
| N  | 0.94343712  | 1.01343007 | -1.27021968 |
| H  | 1.26362214  | 3.50871878 | 1.43420916  |
| H  | 1.50759161  | 0.04530470 | -1.25438672 |
| H  | -0.04175803 | 0.75922322 | -1.73991259 |

Structure: H-Zr-NH<sub>2</sub><sup>+</sup> (<sup>2</sup>A)

CASPT2 Energy (Ha) = -102.64157897

Imaginary Frequencies = 0

|    | x          | y          | z           |
|----|------------|------------|-------------|
| Zr | 1.70896337 | 2.94466686 | -0.56399838 |
| N  | 1.11901013 | 1.15399734 | -1.12876874 |
| H  | 0.66367963 | 3.18720373 | 0.95292757  |
| H  | 1.70126182 | 0.24695832 | -1.29936768 |
| H  | 0.06791808 | 0.86213977 | -1.17612376 |

Structure: <sup>4</sup>T<sub>2</sub> (<sup>4</sup>A)

CASPT2 Energy (Ha) = -102.47257930

Imaginary Frequencies = 1

|    | x          | y          | z           |
|----|------------|------------|-------------|
| Zr | 1.53914632 | 3.15136975 | -0.25741009 |
| N  | 0.71009606 | 1.45931274 | -1.49551659 |
| H  | 1.53960732 | 3.00101247 | 1.59525042  |
| H  | 1.75390137 | 1.16438463 | -0.35026826 |
| H  | 0.49808195 | 0.39888644 | -1.81996380 |

Structure: <sup>2</sup>T<sub>2</sub> (<sup>2</sup>A)

CASPT2 Energy (Ha) = -102.58901680

Imaginary Frequencies = 1

|    | x          | y          | z           |
|----|------------|------------|-------------|
| Zr | 1.72188162 | 3.34520537 | -0.46615006 |
| N  | 0.85636416 | 1.75288842 | -0.85466644 |
| H  | 1.87300456 | 3.01648326 | 1.34704231  |
| H  | 2.45443937 | 1.58634101 | -0.16704655 |
| H  | 0.43514337 | 0.77404798 | -0.94240844 |

Structure: (H)<sub>2</sub>-Zr-NH<sup>+</sup> (<sup>4</sup>A)

CASPT2 Energy (Ha) = -102.50842994

Imaginary Frequencies = 0

|    | x           | y          | z           |
|----|-------------|------------|-------------|
| Zr | 1.71058270  | 2.22416320 | -0.00184710 |
| N  | 0.21134935  | 1.18815067 | -1.64883415 |
| H  | 1.10194544  | 3.40420586 | 1.29681911  |
| H  | 3.43215337  | 1.59453135 | 0.34135184  |
| H  | -0.49519782 | 0.68391494 | -2.39539801 |

Structure: <sup>4</sup>T<sub>3</sub> (<sup>4</sup>A)

CASPT2 Energy (Ha) = -102.45285989

Imaginary Frequencies = 1

|    | x           | y          | z           |
|----|-------------|------------|-------------|
| Zr | 1.56079507  | 2.09544463 | -0.06236680 |
| N  | 0.03505679  | 1.05962137 | -1.84774384 |
| H  | 2.30442937  | 3.07996807 | 1.47552462  |
| H  | 3.08798141  | 2.65082848 | 1.05492620  |
| H  | -0.65742963 | 0.58910346 | -2.65824849 |

Structure: (H)<sub>2</sub><sup>···</sup>-Zr-NH<sup>+</sup> (<sup>4</sup>A)

CASPT2 Energy (Ha) = -102.55065099

Imaginary Frequencies = 0

|    | x           | y          | z           |
|----|-------------|------------|-------------|
| Zr | 1.20663675  | 1.84488404 | -0.49129038 |
| N  | 0.01754263  | 1.03321467 | -1.88354613 |
| H  | 2.54695074  | 3.20715484 | 1.61069930  |
| H  | 3.16123098  | 2.76233531 | 1.33894986  |
| H  | -0.64152810 | 0.58737714 | -2.65272094 |

Structure: (H)<sub>2</sub><sup>···</sup>-Zr-NH<sup>+</sup> (<sup>2</sup>A)

CASPT2 Energy (Ha) = -102.63011207

Imaginary Frequencies = 0

|    | x          | y          | z           |
|----|------------|------------|-------------|
| Zr | 2.16119636 | 3.06968852 | -0.80252617 |
| N  | 1.06198480 | 1.70519877 | -1.27677363 |
| H  | 1.76508618 | 2.88019178 | 1.53237254  |
| H  | 2.39228220 | 2.37598169 | 1.46267957  |
| H  | 0.40028354 | 0.88390529 | -1.55898147 |

Products: Zr-NH<sup>+</sup> + H<sub>2</sub> (<sup>4</sup>A)  
CASPT2 Energy (Ha) = -102.54222215  
Imaginary Frequencies = 0

|    | x           | y           | z           |
|----|-------------|-------------|-------------|
| Zr | -1.31043106 | 1.59726956  | -2.31512614 |
| N  | -1.43723359 | 0.07895804  | -3.57959670 |
| H  | 5.59055988  | 4.40505367  | 4.35515665  |
| H  | 5.01626541  | 4.18348394  | 3.80904964  |
| H  | -1.50832765 | -0.76979922 | -4.28739175 |

Products: Zr-NH<sup>+</sup> + H<sub>2</sub> (<sup>2</sup>A)  
CASPT2 Energy (Ha) = -102.61544212  
Imaginary Frequencies = 0

|    | x           | y          | z           |
|----|-------------|------------|-------------|
| Zr | 3.75689514  | 1.32946968 | -4.22219996 |
| N  | 2.96509161  | 2.46022945 | -3.04366623 |
| H  | -0.58668695 | 1.78240579 | 4.77380311  |
| H  | -0.61549928 | 2.53482785 | 4.44146471  |
| H  | 2.50103257  | 3.12277621 | -2.35263081 |

### Table 1

Structure: Zr(NH<sub>3</sub>)<sup>+</sup> (<sup>4</sup>A)  
CASPT2 Energy (Ha) = -102.60696239  
Imaginary Frequencies = 0

|    | x          | y          | z           |
|----|------------|------------|-------------|
| Zr | 2.05180406 | 3.44533493 | -1.25990686 |
| N  | 0.96229725 | 1.50847403 | -0.57920306 |
| H  | 0.65887589 | 1.54479491 | 0.47178670  |
| H  | 1.57116387 | 0.63403310 | -0.66895366 |
| H  | 0.06669196 | 1.31232903 | -1.12905407 |

Structure: Zr(NH<sub>3</sub>)<sub>2</sub><sup>+</sup> (<sup>4</sup>A)  
CASPT2 Energy (Ha) = -158.87181581  
Imaginary Frequencies = 0

|    | x          | y          | z           |
|----|------------|------------|-------------|
| N  | 1.01468989 | 5.51582230 | -1.43005604 |
| Zr | 3.15494584 | 5.79687209 | -0.47318472 |
| N  | 5.29157868 | 6.07606639 | 0.49600254  |
| H  | 0.22743215 | 5.35300157 | -0.68548593 |
| H  | 0.93904488 | 4.64452447 | -2.09031604 |



|   |            |            |             |
|---|------------|------------|-------------|
| H | 0.69748404 | 6.35252085 | -2.01306265 |
| H | 6.06027657 | 6.20054206 | -0.23325494 |
| H | 5.34695529 | 6.91562695 | 1.15219538  |
| H | 5.58335066 | 5.20968232 | 1.09348941  |

Structure:  $\text{Zr}(\text{NH}_3)_3^+$  ( $^4\text{A}$ )

CASPT2 Energy (Ha) = -215.10714720

Imaginary Frequencies = 0

|    | x          | y           | z           |
|----|------------|-------------|-------------|
| N  | 1.63247643 | 5.42315710  | -1.80679152 |
| Zr | 3.19495721 | 7.20247664  | -2.42602182 |
| N  | 2.48345178 | 9.37233056  | -1.77877457 |
| H  | 1.93809364 | 4.43470885  | -2.05495550 |
| H  | 0.69003901 | 5.57981158  | -2.27690282 |
| H  | 1.46168856 | 5.43789237  | -0.75611100 |
| H  | 3.20976894 | 10.07837639 | -2.10765102 |
| H  | 1.55435111 | 9.65677176  | -2.21404926 |
| H  | 2.38999230 | 9.48894722  | -0.72467550 |
| N  | 4.43348058 | 5.29340254  | -3.20232376 |
| H  | 4.60819472 | 5.38477301  | -4.27891257 |
| H  | 5.40221311 | 5.31847183  | -2.75750867 |
| H  | 4.06975060 | 4.26869008  | -3.07409094 |

Structure:  $\text{Zr}(\text{NH}_3)_4^+$  ( $^4\text{A}$ )

CASPT2 Energy (Ha) = -271.34419507

Imaginary Frequencies = 0

|    | x          | y           | z           |
|----|------------|-------------|-------------|
| N  | 1.58609074 | 7.02433046  | -1.52337387 |
| N  | 4.79101712 | 6.42196229  | -0.84017244 |
| Zr | 3.67410209 | 7.89633878  | -2.41098146 |
| N  | 2.52339026 | 9.36657426  | -3.96571782 |
| H  | 1.71153584 | 6.04806502  | -1.12413529 |
| H  | 0.83404083 | 6.95012211  | -2.27087717 |
| H  | 1.21540133 | 7.65177382  | -0.74975488 |
| H  | 2.91770168 | 9.33598494  | -4.95249024 |
| H  | 1.49386874 | 9.11567548  | -4.03736977 |
| H  | 2.57542953 | 10.36875324 | -3.61469622 |
| H  | 4.86506035 | 5.39925389  | -1.21087505 |
| H  | 5.78831561 | 6.74209940  | -0.65510752 |
| H  | 4.30747132 | 6.37920803  | 0.10670682  |
| N  | 5.71951476 | 8.77237125  | -3.37256060 |
| H  | 5.66291856 | 9.80456531  | -3.63025442 |
| H  | 6.57859919 | 8.69058319  | -2.70106315 |
| H  | 6.03118298 | 8.23698159  | -4.27451888 |

Structure:  $\text{Zr}(\text{NH}_3)_5^+$  ( $^4\text{A}$ )

CASPT2 Energy (Ha) = -327.56458158

Imaginary Frequencies = 0

|    | x          | y           | z           |
|----|------------|-------------|-------------|
| N  | 4.39338598 | 7.35842739  | -0.35330819 |
| N  | 2.05459071 | 7.31234710  | -2.82023200 |
| Zr | 4.08928339 | 8.62737235  | -2.46572784 |
| N  | 6.21485417 | 9.72521070  | -2.00815191 |
| N  | 5.40940159 | 6.88014192  | -3.54878482 |
| H  | 3.72150430 | 7.67537572  | 0.40549011  |
| H  | 5.37932341 | 7.45193838  | 0.02990262  |
| H  | 4.21649891 | 6.32383863  | -0.51877685 |
| H  | 6.39350191 | 6.57206328  | -3.16765176 |
| H  | 4.91576080 | 5.93544323  | -3.80645865 |
| H  | 5.60996525 | 7.33823252  | -4.52002054 |
| H  | 1.32223137 | 7.25929702  | -2.05062311 |
| H  | 1.66300140 | 7.88920584  | -3.61792863 |
| H  | 2.19506219 | 6.32840790  | -3.19369926 |
| H  | 6.06175800 | 10.70962298 | -2.37308261 |
| H  | 6.58147407 | 9.80044637  | -1.01184861 |
| H  | 6.98476805 | 9.31051140  | -2.60880973 |
| N  | 2.69017759 | 10.19763530 | -1.23215120 |
| H  | 2.94949401 | 11.13963189 | -1.64568126 |
| H  | 1.66777433 | 10.04812666 | -1.47278104 |
| H  | 2.77034361 | 10.27333238 | -0.17353165 |

Structure:  $\text{Zr}(\text{NH}_3)_6^+$  ( $^4\text{A}$ )

CASPT2 Energy (Ha) = -383.78393333

Imaginary Frequencies = 0

|    | x          | y           | z           |
|----|------------|-------------|-------------|
| N  | 3.34330609 | 9.78986722  | -2.15067442 |
| Zr | 5.23816138 | 8.26077785  | -2.26492375 |
| N  | 6.87010771 | 10.06329068 | -2.15031546 |
| N  | 3.60564225 | 6.45536970  | -2.38445945 |
| N  | 5.26169476 | 8.41050285  | -4.68659067 |
| N  | 5.21164128 | 8.10944030  | 0.15654145  |
| H  | 2.73501957 | 9.61121060  | -1.29643539 |
| H  | 2.69940821 | 9.71772819  | -2.99479496 |
| H  | 3.66157310 | 10.80278461 | -2.09661459 |
| H  | 7.46672466 | 10.02721711 | -1.26817054 |
| H  | 7.55145407 | 10.06772192 | -2.96912939 |
| H  | 6.40727870 | 11.05058464 | -2.14733822 |
| H  | 5.74067159 | 7.58315587  | -5.15316454 |
| H  | 4.26751520 | 8.43325300  | -5.06659773 |
| H  | 5.73715975 | 9.29258448  | -5.04379178 |
| H  | 4.71018753 | 7.24008901  | 0.50924199  |

|   |            |            |             |
|---|------------|------------|-------------|
| H | 6.20708496 | 8.04872569 | 0.52923323  |
| H | 4.76311804 | 8.94784598 | 0.63356640  |
| H | 2.93811162 | 6.44737794 | -1.55568948 |
| H | 2.99771757 | 6.51497781 | -3.25604754 |
| H | 4.07709846 | 5.50237628 | -2.40918348 |
| N | 7.13251178 | 6.73273846 | -2.37344962 |
| H | 7.78829668 | 6.82315738 | -1.53969752 |
| H | 6.81844616 | 5.71709053 | -2.40309390 |
| H | 7.73021495 | 6.89448698 | -3.23907572 |

Structure:  $\text{Zr}(\text{NH}_3)_7^+$  ( $^4\text{A}$ )

CASPT2 Energy (Ha) = -440.01085281

Imaginary Frequencies = 0

|    | x          | y           | z           |
|----|------------|-------------|-------------|
| N  | 6.61467572 | 9.88696069  | -3.15633540 |
| Zr | 4.31345952 | 9.01960269  | -3.39824066 |
| N  | 4.65407290 | 9.95533217  | -5.67111251 |
| N  | 4.07243783 | 8.94887699  | -0.94682596 |
| N  | 1.83294042 | 8.87583790  | -3.30438133 |
| N  | 5.65106492 | 6.99941993  | -2.80020259 |
| N  | 3.70291399 | 11.36896699 | -3.01938669 |
| H  | 7.28491921 | 9.24819752  | -3.67546247 |
| H  | 6.96149107 | 9.94639883  | -2.15230901 |
| H  | 6.73747738 | 10.85429607 | -3.57842619 |
| H  | 3.79078327 | 9.95861813  | -6.29370454 |
| H  | 4.99210612 | 10.99034755 | -5.64051161 |
| H  | 5.41129279 | 9.42765523  | -6.19974007 |
| H  | 1.52004727 | 7.89441822  | -3.04704811 |
| H  | 1.42306973 | 9.53021438  | -2.57534939 |
| H  | 1.36431702 | 9.12015278  | -4.22632352 |
| H  | 6.34486231 | 7.21129999  | -2.02496181 |
| H  | 5.04334911 | 6.19559727  | -2.46303646 |
| H  | 6.21471379 | 6.63611700  | -3.62359854 |
| H  | 4.37671042 | 8.02131770  | -0.53159434 |
| H  | 4.65491548 | 9.70280278  | -0.47355146 |
| H  | 3.06766516 | 9.10096088  | -0.63911298 |
| H  | 3.03617023 | 11.72686365 | -3.80795019 |
| H  | 3.14251211 | 11.56539662 | -2.10119944 |
| H  | 4.51791206 | 12.05509037 | -3.00268007 |
| N  | 3.68351414 | 7.20949914  | -4.99090761 |
| H  | 4.50617801 | 6.91381635  | -5.59349409 |
| H  | 3.33057086 | 6.33789261  | -4.49768730 |
| H  | 2.91556615 | 7.52089562  | -5.65380365 |

**Figure 2**

Reactants:  $\text{Zr}(\text{NH}_3)_7^+ + \text{NH}_3 (^4\text{A})$   
CASPT2 Energy (Ha) = -496.14548141  
Imaginary Frequencies = 0

|    | x           | y           | z           |
|----|-------------|-------------|-------------|
| N  | 2.63603118  | 10.31230706 | -2.09260249 |
| Zr | 4.27951462  | 9.04125461  | -3.46843458 |
| N  | 6.67227447  | 9.27824203  | -2.79074542 |
| N  | 4.84329340  | 11.35121136 | -4.14716262 |
| N  | 3.42784629  | 6.69790680  | -3.52865949 |
| N  | 5.48125355  | 8.20037498  | -5.45626294 |
| N  | 4.49063655  | 8.16021145  | -1.14342817 |
| N  | 2.38613677  | 9.27552857  | -5.03363100 |
| H  | 3.08872084  | 10.71576366 | -1.22095340 |
| H  | 1.81342190  | 9.72182581  | -1.76880972 |
| H  | 2.23068936  | 11.13250544 | -2.63139287 |
| H  | 5.03110209  | 11.92310513 | -3.27264640 |
| H  | 5.71603198  | 11.42034636 | -4.74976548 |
| H  | 4.06834903  | 11.84876984 | -4.67830662 |
| H  | 6.34535113  | 7.66659586  | -5.14905072 |
| H  | 4.90553436  | 7.52843084  | -6.04411404 |
| H  | 5.81073516  | 8.97351228  | -6.10857506 |
| H  | 3.55214542  | 7.85697853  | -0.75076153 |
| H  | 5.13345450  | 7.31636447  | -1.09449833 |
| H  | 4.88401893  | 8.88659752  | -0.47607451 |
| H  | 4.20732270  | 6.01775037  | -3.28826450 |
| H  | 2.63396720  | 6.51237545  | -2.84703277 |
| H  | 3.07323545  | 6.42622103  | -4.49215470 |
| H  | 1.55438290  | 8.74396211  | -4.64313674 |
| H  | 2.06541761  | 10.27794641 | -5.17902696 |
| H  | 2.58409950  | 8.87637129  | -5.99846456 |
| H  | 6.78280899  | 9.95184952  | -1.97641890 |
| H  | 7.11055829  | 8.35765724  | -2.49084533 |
| H  | 7.26975061  | 9.65823059  | -3.58222497 |
| N  | -7.28443949 | 7.83703706  | -6.43909537 |
| H  | -7.71991351 | 8.81777435  | -6.57540840 |
| H  | -7.36593336 | 7.27194514  | -7.35783936 |
| H  | -7.80208240 | 7.31639684  | -5.64470907 |

Radical fragments:  $[\text{H-Zr}(\text{NH}_3)_7]^+ + \text{NH}_2 (^4\text{A})$   
CASPT2 Energy (Ha) = -496.14420445  
Imaginary Frequencies = 0

|    | x          | y           | z           |
|----|------------|-------------|-------------|
| N  | 2.72991997 | 10.16009135 | -2.30235656 |
| Zr | 4.39721192 | 9.02836639  | -3.70858342 |

|   |            |             |             |
|---|------------|-------------|-------------|
| N | 5.70775955 | 9.59482167  | -1.71922088 |
| N | 3.54503954 | 7.11057934  | -4.96737713 |
| N | 3.62696596 | 7.34707213  | -2.09124888 |
| N | 5.11993674 | 11.33009290 | -4.01738289 |
| N | 6.32936655 | 7.55248475  | -3.73630801 |
| N | 2.64559337 | 9.90245888  | -5.17769283 |
| N | 8.75513011 | 18.71552390 | 1.87420510  |
| H | 1.77193956 | 9.71887659  | -2.45937905 |
| H | 2.57161625 | 11.22930999 | -2.45486361 |
| H | 2.89854753 | 10.05988617 | -1.25442697 |
| H | 2.59725574 | 7.12832198  | -2.26363020 |
| H | 4.11990060 | 6.37296129  | -2.09290763 |
| H | 3.66300255 | 7.66260000  | -1.07318095 |
| H | 6.31957107 | 7.09868618  | -4.68977137 |
| H | 7.20121539 | 8.15151081  | -3.71775464 |
| H | 6.44639461 | 6.79368513  | -3.00301584 |
| H | 2.44642004 | 10.93484646 | -5.04586800 |
| H | 2.96844771 | 9.76790786  | -6.17612552 |
| H | 1.71459386 | 9.40643459  | -5.06317059 |
| H | 4.87456020 | 11.57233004 | -5.01556875 |
| H | 4.76294621 | 12.10452146 | -3.38488794 |
| H | 6.17685747 | 11.34544304 | -3.97552248 |
| H | 5.27418072 | 10.38152894 | -1.15375304 |
| H | 5.80197471 | 8.77432436  | -1.05255514 |
| H | 6.69638490 | 9.90511571  | -1.95280861 |
| H | 2.49575977 | 6.98164973  | -4.87589071 |
| H | 3.76861548 | 7.26632715  | -5.98976950 |
| H | 3.97895032 | 6.18565533  | -4.68611161 |
| H | 8.31421947 | 19.15886691 | 2.80449790  |
| H | 9.64009766 | 19.37406770 | 1.67540778  |
| H | 5.24966748 | 9.17288726  | -5.46428802 |

Radical fragments:  $[\text{H-Zr}(\text{NH}_3)_7]^+ + \text{NH}_2(^2\text{A})$

CASPT2 Energy (Ha) = -496.14433227

Imaginary Frequencies = 0

|    | x          | y           | z           |
|----|------------|-------------|-------------|
| N  | 2.72991997 | 10.16009135 | -2.30235656 |
| Zr | 4.39721192 | 9.02836639  | -3.70858342 |
| N  | 5.70775955 | 9.59482167  | -1.71922088 |
| N  | 3.54503954 | 7.11057934  | -4.96737713 |
| N  | 3.62696596 | 7.34707213  | -2.09124888 |
| N  | 5.11993674 | 11.33009290 | -4.01738289 |
| N  | 6.32936655 | 7.55248475  | -3.73630801 |
| N  | 2.64559337 | 9.90245888  | -5.17769283 |
| N  | 8.75513011 | 18.71552390 | 1.87420510  |
| H  | 1.77193956 | 9.71887659  | -2.45937905 |
| H  | 2.57161625 | 11.22930999 | -2.45486361 |
| H  | 2.89854753 | 10.05988617 | -1.25442697 |

|   |            |             |             |
|---|------------|-------------|-------------|
| H | 2.59725574 | 7.12832198  | -2.26363020 |
| H | 4.11990060 | 6.37296129  | -2.09290763 |
| H | 3.66300255 | 7.66260000  | -1.07318095 |
| H | 6.31957107 | 7.09868618  | -4.68977137 |
| H | 7.20121539 | 8.15151081  | -3.71775464 |
| H | 6.44639461 | 6.79368513  | -3.00301584 |
| H | 2.44642004 | 10.93484646 | -5.04586800 |
| H | 2.96844771 | 9.76790786  | -6.17612552 |
| H | 1.71459386 | 9.40643459  | -5.06317059 |
| H | 4.87456020 | 11.57233004 | -5.01556875 |
| H | 4.76294621 | 12.10452146 | -3.38488794 |
| H | 6.17685747 | 11.34544304 | -3.97552248 |
| H | 5.27418072 | 10.38152894 | -1.15375304 |
| H | 5.80197471 | 8.77432436  | -1.05255514 |
| H | 6.69638490 | 9.90511571  | -1.95280861 |
| H | 2.49575977 | 6.98164973  | -4.87589071 |
| H | 3.76861548 | 7.26632715  | -5.98976950 |
| H | 3.97895032 | 6.18565533  | -4.68611161 |
| H | 8.31421947 | 19.15886691 | 2.80449790  |
| H | 9.64009766 | 19.37406770 | 1.67540778  |
| H | 5.24966748 | 9.17288726  | -5.46428802 |

Structure:  $[\text{H-Zr}(\text{NH}_3)_7]^+ \cdots \text{NH}_2 (^4\text{A})$

CASPT2 Energy (Ha) = -496.17582476

Imaginary Frequencies = 0

|    | x          | y           | z           |
|----|------------|-------------|-------------|
| N  | 3.83230967 | 11.22940009 | -1.40667637 |
| Zr | 4.73941098 | 9.72535835  | -3.08848303 |
| N  | 5.10692859 | 8.40742277  | -1.03907773 |
| N  | 4.09211540 | 8.37719307  | -5.02067889 |
| N  | 2.61386508 | 8.60735783  | -2.53720255 |
| N  | 6.66094153 | 10.85730627 | -2.11393345 |
| N  | 6.58288236 | 8.18184201  | -3.52248960 |
| N  | 3.12701709 | 11.13119407 | -4.25174201 |
| N  | 5.27252266 | 13.40598323 | -3.50372336 |
| H  | 4.06535807 | 12.22858596 | -1.67615263 |
| H  | 4.24210351 | 11.07779745 | -0.41313092 |
| H  | 2.78057403 | 11.16869914 | -1.28742518 |
| H  | 1.75516199 | 8.78963373  | -3.14108036 |
| H  | 2.76422193 | 7.52877256  | -2.60481021 |
| H  | 2.29101213 | 8.74688873  | -1.53080054 |
| H  | 6.97210947 | 8.39249743  | -4.48382345 |
| H  | 7.38894666 | 8.25037504  | -2.83800019 |
| H  | 6.27652715 | 7.16587665  | -3.50845576 |
| H  | 3.18186802 | 12.12467516 | -3.89685326 |
| H  | 3.47919309 | 11.14719726 | -5.24598041 |
| H  | 2.10322747 | 10.85609445 | -4.26499912 |
| H  | 6.43190425 | 11.87273012 | -1.93473071 |

|   |            |             |             |
|---|------------|-------------|-------------|
| H | 7.10438220 | 10.47226607 | -1.23132611 |
| H | 7.38324927 | 10.84266254 | -2.88265946 |
| H | 4.42854893 | 8.63438972  | -0.25019810 |
| H | 4.91743516 | 7.38395903  | -1.26658173 |
| H | 6.07497228 | 8.42137172  | -0.59760522 |
| H | 3.11625392 | 8.56906141  | -5.38641452 |
| H | 4.76724832 | 8.57918224  | -5.81036461 |
| H | 4.12601966 | 7.33580423  | -4.81945480 |
| H | 5.52279215 | 14.44148599 | -3.78310534 |
| H | 5.69891667 | 12.77953458 | -4.28597041 |
| H | 5.71002333 | 10.55663712 | -4.58737991 |

Transition state:  ${}^4T_4 ({}^4A)$

CASPT2 Energy (Ha) = -496.14544820

Imaginary Frequencies = 1

|    | x          | y           | z           |
|----|------------|-------------|-------------|
| N  | 4.16629088 | 10.93398681 | -0.97311945 |
| Zr | 4.80910726 | 9.91179423  | -3.11455438 |
| N  | 3.72662079 | 8.09739689  | -1.78142961 |
| N  | 4.10401165 | 9.81572609  | -5.48962968 |
| N  | 2.33413993 | 10.20330635 | -3.24431650 |
| N  | 6.62389889 | 9.05872591  | -1.63691813 |
| N  | 5.45078934 | 7.71376639  | -4.03846145 |
| N  | 4.49842430 | 12.26308894 | -3.85471239 |
| N  | 6.61106155 | 11.71783780 | -2.23071777 |
| H  | 4.70480322 | 11.82769718 | -0.80577139 |
| H  | 4.41154369 | 10.28420483 | -0.13758289 |
| H  | 3.13541459 | 11.15653830 | -0.85109137 |
| H  | 1.92731022 | 11.12995037 | -3.57901697 |
| H  | 1.91921952 | 9.45861474  | -3.92402004 |
| H  | 1.83143235 | 9.99495503  | -2.32853651 |
| H  | 6.11535070 | 7.91238257  | -4.83563676 |
| H  | 5.95672311 | 7.06720842  | -3.36927634 |
| H  | 4.63157501 | 7.15677623  | -4.41877860 |
| H  | 4.50482457 | 12.95684201 | -3.05624474 |
| H  | 5.33334143 | 12.46769610 | -4.46919671 |
| H  | 3.62722806 | 12.45782308 | -4.42432052 |
| H  | 6.79533721 | 9.66135161  | -0.78484464 |
| H  | 6.51424469 | 8.06357943  | -1.29143137 |
| H  | 7.49255836 | 9.09474808  | -2.23809820 |
| H  | 3.08654279 | 8.44006744  | -1.00275535 |
| H  | 3.08138093 | 7.55929665  | -2.43570305 |
| H  | 4.34444706 | 7.35970130  | -1.32801857 |
| H  | 3.47549909 | 10.60225154 | -5.81866933 |
| H  | 4.99223307 | 9.86029788  | -6.06074210 |
| H  | 3.59787738 | 8.91695551  | -5.73773302 |
| H  | 7.12859174 | 12.50240988 | -1.66860290 |
| H  | 7.27098903 | 11.47128711 | -3.03764969 |

H 6.40723072 10.17097134 -4.24372957

Structure:  $\text{Zr}(\text{NH}_3)_6(\text{NH}_2)^+ \cdots \text{NH}_3 + \text{H} (^4\text{A})$

CASPT2 Energy (Ha) = -496.18487689

Imaginary Frequencies = 0

|    | x          | y           | z            |
|----|------------|-------------|--------------|
| N  | 3.34364659 | 11.09581533 | -1.44881562  |
| Zr | 4.91538616 | 9.67674586  | -2.57373480  |
| N  | 4.75023329 | 8.32834095  | -0.52820254  |
| N  | 4.59601007 | 8.89683791  | -4.86668445  |
| N  | 2.82289246 | 8.44060393  | -2.70531592  |
| N  | 6.36746060 | 10.82436299 | -1.02117894  |
| N  | 6.64800490 | 8.04466227  | -2.87375059  |
| N  | 2.35318627 | 11.21916051 | -4.54101114  |
| N  | 5.72596589 | 11.20446780 | -3.76967349  |
| H  | 2.32195767 | 10.95261499 | -1.69078780  |
| H  | 3.58562239 | 12.10977141 | -1.74926537  |
| H  | 3.41149125 | 11.08070120 | -0.38801535  |
| H  | 2.19116955 | 8.91718121  | -3.41149214  |
| H  | 2.91285932 | 7.40049026  | -3.01043170  |
| H  | 2.29702002 | 8.40020354  | -1.78351460  |
| H  | 7.29278229 | 8.34702021  | -3.66143219  |
| H  | 7.24804409 | 7.94353960  | -2.00454502  |
| H  | 6.30612268 | 7.06506089  | -3.10175766  |
| H  | 1.55090370 | 11.72787453 | -4.04672958  |
| H  | 3.24719718 | 11.76427182 | -4.37946272  |
| H  | 2.12755393 | 11.23865751 | -5.58927235  |
| H  | 6.18572170 | 10.61914105 | 0.00411019   |
| H  | 7.37878756 | 10.56060099 | -1.20623562  |
| H  | 6.30551905 | 11.87699991 | -1.13863134  |
| H  | 3.99950696 | 8.61538352  | 0.17792918   |
| H  | 4.52475199 | 7.31384658  | -0.77100880  |
| H  | 5.65237337 | 8.27587821  | 0.03713321   |
| H  | 3.74395587 | 9.38350506  | -5.25733192  |
| H  | 5.42432178 | 9.16224553  | -5.46897055  |
| H  | 4.44950311 | 7.85327076  | -4.97567737  |
| H  | 6.32753144 | 11.99802119 | -3.44168609  |
| H  | 5.69351576 | 11.31443981 | -4.83722909  |
| H  | 8.98904412 | 15.71751867 | -12.10863784 |

Products:  $\text{Zr}(\text{NH}_3)_6(\text{NH}_2)^+ + \text{NH}_3 + \text{H} (^4\text{A})$

CASPT2 Energy (Ha) = -496.14634031

Imaginary Frequencies = 0

|    | x          | y           | z           |
|----|------------|-------------|-------------|
| N  | 3.74454799 | 11.93807035 | -0.58782053 |
| Zr | 5.32302999 | 10.62773235 | -1.81054393 |



|   |             |             |              |
|---|-------------|-------------|--------------|
| N | 6.10256804  | 9.48955414  | 0.21718437   |
| N | 4.01723925  | 10.04781419 | -3.80346774  |
| N | 3.67206390  | 8.92171943  | -1.17184304  |
| N | 6.85940852  | 12.12645559 | -0.64039496  |
| N | 6.76656060  | 8.95055504  | -2.72590443  |
| N | -0.41556338 | 4.40776885  | -10.31822282 |
| N | 5.80251489  | 12.10336076 | -3.21482890  |
| H | 2.73006631  | 11.65163329 | -0.72236957  |
| H | 3.81849777  | 12.95505154 | -0.96440435  |
| H | 3.89513596  | 11.99763555 | 0.46375797   |
| H | 2.71227022  | 9.03407473  | -1.62103917  |
| H | 3.96113950  | 7.88617825  | -1.37280426  |
| H | 3.49447930  | 8.93986102  | -0.12027450  |
| H | 7.13602598  | 9.35636270  | -3.63220810  |
| H | 7.60759042  | 8.73680078  | -2.11580390  |
| H | 6.31731802  | 8.01535800  | -2.95366320  |
| H | -1.04517092 | 3.68619078  | -9.81513326  |
| H | -1.02662983 | 5.06158210  | -10.92593888 |
| H | 0.29879221  | 3.89157284  | -10.94541390 |
| H | 6.80954015  | 12.07134662 | 0.41736102   |
| H | 7.87155767  | 11.95139829 | -0.91189336  |
| H | 6.63620097  | 13.12740361 | -0.90743197  |
| H | 5.57858943  | 9.77712321  | 1.10249872   |
| H | 5.97420149  | 8.43332038  | 0.15529221   |
| H | 7.13547327  | 9.63759314  | 0.43004861   |
| H | 3.17653131  | 10.68982123 | -3.90105450  |
| H | 4.61121926  | 10.18660422 | -4.67005829  |
| H | 3.65263421  | 9.05285400  | -3.83672243  |
| H | 6.55392345  | 12.82819185 | -3.13081806  |
| H | 5.40187565  | 12.21552722 | -4.17607413  |
| H | 9.71641139  | 17.77271993 | -9.72132073  |

Structure:  $\text{H}_3\text{N} \cdots [\text{H-Zr}(\text{NH}_3)_6(\text{NH}_2)]^+$  ( $^2\text{A}$ )

CASPT2 Energy (Ha) = -496.2728640

Imaginary Frequencies = 0

|    | x          | y           | z           |
|----|------------|-------------|-------------|
| N  | 3.49960286 | 10.96052408 | -1.71526359 |
| Zr | 4.69628839 | 9.55783638  | -3.36532121 |
| N  | 6.17779743 | 9.62895477  | -1.75433028 |
| N  | 3.09632532 | 8.00799708  | -4.54376243 |
| N  | 3.75444414 | 7.93735701  | -1.72300159 |
| N  | 5.83749161 | 11.63026191 | -3.93038847 |
| N  | 6.07201773 | 7.58346761  | -3.84546129 |
| N  | 3.01323146 | 11.00110224 | -4.56338068 |
| N  | 5.93192463 | 12.83264207 | -1.07631055 |
| H  | 2.43978383 | 10.97377246 | -1.73873674 |
| H  | 3.84078150 | 11.98594991 | -1.78936693 |
| H  | 3.80029812 | 10.64441834 | -0.75375320 |

|   |            |             |             |
|---|------------|-------------|-------------|
| H | 2.69988748 | 7.90256047  | -1.60745003 |
| H | 4.07134776 | 6.93037939  | -1.97070433 |
| H | 4.18792240 | 8.14930341  | -0.78190112 |
| H | 5.78853879 | 6.94633995  | -4.64121229 |
| H | 6.92046246 | 8.11241993  | -4.17297684 |
| H | 6.35370140 | 7.00659987  | -3.00466995 |
| H | 3.13190625 | 12.02508701 | -4.32604680 |
| H | 3.29875780 | 10.86476630 | -5.56964207 |
| H | 1.98301469 | 10.76781825 | -4.46740507 |
| H | 5.74831956 | 11.82769652 | -4.96083245 |
| H | 5.62727014 | 12.50158077 | -3.36716883 |
| H | 6.84096072 | 11.37014018 | -3.74912016 |
| H | 6.20733094 | 11.80643650 | -1.16129544 |
| H | 6.05399197 | 9.42839130  | -0.72808579 |
| H | 7.21473502 | 9.57832078  | -1.91484539 |
| H | 2.05579961 | 8.17897956  | -4.42985830 |
| H | 3.37005703 | 8.21421809  | -5.54049572 |
| H | 3.27153864 | 6.97952080  | -4.36739379 |
| H | 6.79278958 | 13.44380306 | -1.28288146 |
| H | 5.66509985 | 13.02777015 | -0.02368826 |
| H | 5.20662399 | 9.52281990  | -5.30455896 |

Transition state:  ${}^2T_3$  ( ${}^2A$ )

CASPT2 Energy (Ha) = -496.23481245

Imaginary Frequencies = 1

|    | x          | y           | z           |
|----|------------|-------------|-------------|
| N  | 4.09097605 | 10.11299440 | -1.11234717 |
| Zr | 4.54342676 | 9.04556366  | -3.08158967 |
| N  | 2.39813430 | 7.97143257  | -2.58528741 |
| N  | 6.48184768 | 7.64667727  | -3.81200939 |
| N  | 2.92988000 | 10.33161918 | -3.97699570 |
| N  | 5.70431842 | 10.43716604 | -4.66089402 |
| N  | 4.98121740 | 7.36480630  | -1.29719786 |
| N  | 3.91204370 | 7.96241095  | -5.23090277 |
| H  | 3.97179421 | 9.73455835  | -0.13497164 |
| H  | 3.71254549 | 11.09147516 | -1.11824694 |
| H  | 5.39289410 | 10.10978326 | -1.42451812 |
| H  | 6.76902525 | 7.86736541  | -4.80558293 |
| H  | 7.29212223 | 7.89839603  | -3.18140492 |
| H  | 6.32350333 | 6.60031397  | -3.75724554 |
| H  | 6.72482292 | 10.25008740 | -4.86095884 |
| H  | 5.19817552 | 10.54234530 | -5.58160489 |
| H  | 5.65193556 | 11.36721955 | -4.15501115 |
| H  | 4.25203753 | 7.43112446  | -0.53239188 |
| H  | 4.99426808 | 6.32522976  | -1.61504920 |
| H  | 5.92154300 | 7.56387633  | -0.85206741 |
| H  | 2.12191790 | 10.58679360 | -3.29537965 |
| H  | 3.14595860 | 8.65601018  | -5.44021287 |

|   |            |             |             |
|---|------------|-------------|-------------|
| H | 3.22253655 | 11.31919435 | -4.32096283 |
| H | 4.60923490 | 7.98107791  | -6.02713306 |
| H | 3.50105643 | 6.98697904  | -5.19280731 |
| H | 2.30309851 | 6.92026116  | -2.48962128 |
| H | 2.04249468 | 8.42228697  | -1.69881787 |
| H | 1.77667131 | 8.29797632  | -3.37239569 |
| H | 6.24081433 | 9.78500574  | -2.03356738 |
| N | 5.42624132 | 12.84565391 | -2.82599949 |
| H | 4.40284746 | 13.03534429 | -2.58263161 |
| H | 5.93076185 | 12.49953674 | -1.95061652 |
| H | 5.87978166 | 13.76258846 | -3.15425207 |

Structure:  $\text{H}_3\text{N} \cdots \text{Zr}(\text{NH}_3)_5(\text{NH}_2)_2^+ \cdots \text{H}_2$  ( $^2\text{A}$ )

CASPT2 Energy (Ha) = -496.28723511

Imaginary Frequencies = 0

|    | x          | y           | z           |
|----|------------|-------------|-------------|
| N  | 4.05654679 | 9.92116581  | -1.24173854 |
| Zr | 4.05904559 | 9.05321688  | -3.16544779 |
| N  | 2.30545716 | 7.77548206  | -2.00516612 |
| N  | 6.50244919 | 9.32788416  | -3.33525291 |
| N  | 2.25641929 | 9.58656013  | -4.31041752 |
| N  | 4.45412339 | 11.21153522 | -4.22344327 |
| N  | 5.02487163 | 6.88605012  | -2.53961030 |
| N  | 4.44811297 | 7.92919359  | -5.40269286 |
| H  | 3.46752599 | 9.64932821  | -0.41510976 |
| H  | 4.60295646 | 10.76760210 | -0.95326074 |
| H  | 6.60036212 | 8.74620493  | -0.06745183 |
| H  | 6.89548606 | 9.35478577  | -4.31759825 |
| H  | 6.64675684 | 10.27805486 | -2.89288160 |
| H  | 7.07943474 | 8.63603165  | -2.78322110 |
| H  | 5.40223525 | 11.67836070 | -4.19530736 |
| H  | 4.10579021 | 11.17772931 | -5.21977076 |
| H  | 3.78274755 | 11.81646608 | -3.67861830 |
| H  | 4.30946213 | 6.11089791  | -2.60385776 |
| H  | 5.84678533 | 6.61438374  | -3.14650246 |
| H  | 5.35338027 | 6.94404909  | -1.53476167 |
| H  | 1.37816838 | 8.95008190  | -4.30751166 |
| H  | 3.58211771 | 8.40935028  | -5.76152210 |
| H  | 1.81656234 | 10.57769183 | -4.29381513 |
| H  | 5.26718063 | 8.19189786  | -6.02462939 |
| H  | 4.30690288 | 6.88167634  | -5.49042604 |
| H  | 2.55961065 | 7.32449850  | -1.07986351 |
| H  | 1.66056480 | 8.58429604  | -1.80477003 |
| H  | 1.76329340 | 7.07246727  | -2.58421473 |
| H  | 7.28061166 | 8.41122176  | 0.10521916  |
| N  | 6.68649793 | 12.11913316 | -1.88357055 |
| H  | 6.95730734 | 11.69345915 | -0.93531188 |
| H  | 7.49655209 | 12.75321638 | -2.20665084 |

H 5.82158923 12.73450104 -1.72866210

Products:  $\text{Zr}(\text{NH}_3)_5(\text{NH}_2)_2^+ + \text{H}_2 + \text{NH}_3 (^2\text{A})$

CASPT2 Energy (Ha) = -496.25631518

Imaginary Frequencies = 0

|    | x           | y           | z            |
|----|-------------|-------------|--------------|
| N  | 4.93706099  | 11.58697043 | -2.46039388  |
| Zr | 3.20523031  | 10.52099803 | -3.15197015  |
| N  | 2.81945842  | 12.62688060 | -4.31442678  |
| N  | 4.62856806  | 8.50473593  | -3.01551092  |
| N  | 3.15477932  | 9.78864875  | -0.82224606  |
| N  | 4.39286597  | 10.38080582 | -5.31690775  |
| N  | 1.31716019  | 11.18316531 | -2.42401857  |
| N  | 1.89175767  | 8.81452086  | -4.41440332  |
| N  | 3.87639697  | 6.28277438  | -14.35853037 |
| H  | 5.45966826  | 11.43145878 | -1.53051775  |
| H  | 5.31925534  | 12.50078772 | -2.81428610  |
| H  | 9.83534028  | 0.53626197  | -2.56316940  |
| H  | 3.94859144  | 10.95479037 | -6.08686639  |
| H  | 5.32120675  | 10.81871957 | -5.06516248  |
| H  | 4.57969555  | 9.41748948  | -5.71511340  |
| H  | 3.66413645  | 13.05383093 | -4.79483064  |
| H  | 1.96712594  | 12.76258281 | -4.98444464  |
| H  | 2.60876767  | 13.26993190 | -3.46663385  |
| H  | 4.34217426  | 7.83308190  | -2.24994067  |
| H  | 4.76390145  | 7.93418736  | -3.89726419  |
| H  | 5.55819340  | 8.93421388  | -2.75435744  |
| H  | 0.83186326  | 10.86102128 | -1.55156231  |
| H  | 0.96306261  | 9.16034726  | -4.05858769  |
| H  | 0.70765794  | 11.92102313 | -2.85317836  |
| H  | 1.87627633  | 8.86180812  | -5.47428192  |
| H  | 1.98936827  | 7.79454341  | -4.13909710  |
| H  | 4.08602873  | 9.47110964  | -0.43142489  |
| H  | 2.94656580  | 10.73024215 | -0.39483638  |
| H  | 2.40639581  | 9.10943568  | -0.49809415  |
| H  | 10.44625721 | 1.03641833  | -2.48141365  |
| H  | 3.73168022  | 5.21071480  | -14.36396822 |
| H  | 3.09697190  | 6.75678507  | -14.93998628 |
| H  | 4.84202719  | 6.52048934  | -14.78437731 |

### Figure 3

(left)

Reactants:  $\text{Re}^+ + \text{NH}_3$  ( ${}^7\text{A}$ )

CASPT2 Energy (Ha) = -133.54649873

Imaginary Frequencies = 0

|    | x           | y           | z           |
|----|-------------|-------------|-------------|
| Re | 5.51776201  | 9.80714644  | -3.90204296 |
| N  | 0.03823256  | -0.13350044 | -0.00867725 |
| H  | -0.18539223 | 0.04138905  | 1.07505498  |
| H  | 0.66720284  | -1.05999138 | -0.02494414 |
| H  | -0.90697218 | -0.39007767 | -0.48472160 |

Structure:  $\text{Re}(\text{NH}_3)^+$  ( ${}^7\text{A}$ )

CASPT2 Energy (Ha) = -133.63972394

Imaginary Frequencies = 0

|    | x          | y          | z           |
|----|------------|------------|-------------|
| Re | 2.03917506 | 3.53460723 | -1.30957988 |
| N  | 0.91262160 | 1.46028026 | -0.61134175 |
| H  | 0.61445809 | 1.45862171 | 0.44668397  |
| H  | 1.54406093 | 0.56563255 | -0.70681195 |
| H  | 0.02051730 | 1.24582425 | -1.16428137 |

Transition state: TS ( ${}^7\text{A}$ )

CASPT2 Energy (Ha) = -133.51521496

Imaginary Frequencies = 1

|    | x          | y          | z           |
|----|------------|------------|-------------|
| Re | 1.55910000 | 3.92540000 | -0.41740000 |
| N  | 0.66550000 | 1.09060000 | -1.08340000 |
| H  | 1.82300000 | 2.44860000 | 0.35320000  |
| H  | 1.01240000 | 0.30110000 | -0.34930000 |
| H  | 0.09080000 | 0.51910000 | -1.82850000 |

Structure:  $\text{H-Re-NH}_2^+$  ( ${}^7\text{A}$ )

CASPT2 Energy (Ha) = -133.51521563

Imaginary Frequencies = 0

|    | x          | y          | z           |
|----|------------|------------|-------------|
| Re | 1.20734843 | 2.89349816 | -0.04141772 |
| N  | 0.92409752 | 0.74798221 | -1.09546339 |
| H  | 1.39475966 | 4.43073378 | 0.70604686  |
| H  | 1.68581793 | 0.22069051 | -1.72005490 |

H 0.04880943 0.10206137 -1.06444181

(right)

Structure:  $\text{Re}(\text{NH}_3)_2^+ + \text{NH}_3$  ( $^5\text{A}$ )

CASPT2 Energy (Ha) = -246.05799261

Imaginary Frequencies = 0

|    | x           | y           | z           |
|----|-------------|-------------|-------------|
| N  | 0.51019683  | 0.38958392  | -0.26883681 |
| Re | 5.66890092  | 10.51834279 | -4.11539589 |
| N  | 3.83848236  | 11.56095577 | -3.60480239 |
| H  | 0.36555509  | 0.63949481  | 0.77404684  |
| H  | 1.15867366  | -0.47212869 | -0.35119490 |
| H  | -0.44466250 | 0.17271438  | -0.72825416 |
| H  | 3.88707323  | 12.60216781 | -3.82195641 |
| H  | 2.98843780  | 11.16436606 | -4.10860512 |
| H  | 3.62812874  | 11.47917394 | -2.53572775 |
| N  | 7.49977269  | 9.47516561  | -4.63599056 |
| H  | 7.43948352  | 8.43709340  | -4.41292550 |
| H  | 7.72219599  | 9.55874703  | -5.67255480 |
| H  | 8.33742263  | 9.85955919  | -4.10546651 |

Structure:  $\text{Re}(\text{NH}_3)_3^+$  ( $^5\text{A}$ )

CASPT2 Energy (Ha) = -246.12313639

Imaginary Frequencies = 0

|    | x          | y           | z           |
|----|------------|-------------|-------------|
| N  | 3.54858374 | 5.90579608  | -1.90861196 |
| Re | 4.27917676 | 8.00054963  | -3.26677333 |
| N  | 2.45431994 | 9.06020648  | -3.78708360 |
| H  | 4.32016935 | 5.25016883  | -1.57518866 |
| H  | 2.88081213 | 5.33570401  | -2.51318682 |
| H  | 3.01417000 | 6.23856275  | -1.04824180 |
| H  | 2.46879328 | 10.04464141 | -3.38494018 |
| H  | 2.35544255 | 9.13404535  | -4.84341015 |
| H  | 1.54153721 | 8.58956606  | -3.42221931 |
| N  | 6.27794699 | 7.16786337  | -2.90047228 |
| H  | 6.38003543 | 6.19953970  | -3.32352473 |
| H  | 7.03053426 | 7.77666894  | -3.33203644 |
| H  | 6.48813933 | 7.10192341  | -1.86197469 |

Structure: TS ( $^5\text{A}$ )

CASPT2 Energy (Ha) = -246.06321611

Imaginary Frequencies = 1

|   | x          | y          | z           |
|---|------------|------------|-------------|
| N | 3.46230577 | 6.37150360 | -1.72113970 |

|    |            |            |             |
|----|------------|------------|-------------|
| Re | 4.34035835 | 7.85896978 | -3.18049796 |
| N  | 2.46092698 | 8.76753203 | -3.81978777 |
| H  | 3.65984303 | 6.18623974 | -3.27907501 |
| H  | 2.42602718 | 6.15140972 | -1.63564342 |
| H  | 3.98828812 | 5.53645276 | -1.32513097 |
| H  | 2.40791884 | 9.81131117 | -3.62358420 |
| H  | 2.29807013 | 8.62977908 | -4.86174448 |
| H  | 1.60607365 | 8.31451359 | -3.31632909 |
| N  | 6.35388391 | 7.16759070 | -2.64969551 |
| H  | 6.57159872 | 6.23363231 | -3.10669363 |
| H  | 7.11489764 | 7.84408823 | -2.94767939 |
| H  | 6.44946864 | 7.03221328 | -1.60066286 |

Structure: H-Re(NH<sub>3</sub>)<sub>2</sub>(NH<sub>2</sub>)<sup>+</sup> (<sup>5</sup>A)

CASPT2 Energy (Ha) = -246.14922591

Imaginary Frequencies = 1

|    | x          | y          | z           |
|----|------------|------------|-------------|
| N  | 3.45973983 | 6.75987472 | -1.49699985 |
| Re | 4.25590255 | 7.54330002 | -3.20719452 |
| N  | 2.31788481 | 8.33849184 | -3.76945802 |
| H  | 4.94764868 | 8.22871532 | -4.69820689 |
| H  | 2.45992071 | 6.81893885 | -1.18349052 |
| H  | 3.97744312 | 6.22524990 | -0.75698400 |
| H  | 2.00657753 | 9.14390426 | -3.14675106 |
| H  | 2.30336213 | 8.68435440 | -4.77437352 |
| H  | 1.53769392 | 7.57982872 | -3.68536021 |
| N  | 6.20724543 | 6.75873365 | -2.65818884 |
| H  | 6.19400759 | 5.70188498 | -2.54614182 |
| H  | 6.93990362 | 6.98866478 | -3.39100338 |
| H  | 6.55233112 | 7.15329466 | -1.73351135 |

### Table 3

Structure: Re(NH<sub>3</sub>)<sup>+</sup> (<sup>7</sup>A)

CASPT2 Energy (Ha) = -133.63970639

Imaginary Frequencies = 0

|    | x          | y          | z           |
|----|------------|------------|-------------|
| Re | 2.04290743 | 3.50687902 | -1.38816948 |
| N  | 0.91370057 | 1.46455493 | -0.60191771 |
| H  | 0.63295479 | 1.50567753 | 0.45989060  |
| H  | 1.53950622 | 0.56379819 | -0.67311353 |
| H  | 0.01176397 | 1.23405630 | -1.13202087 |

Structure:  $\text{Re}(\text{NH}_3)^+$  ( $^5\text{A}$ )

CASPT2 Energy (Ha) = -133.60610953

Imaginary Frequencies = 0

|    | x          | y          | z           |
|----|------------|------------|-------------|
| Re | 1.94691891 | 3.28375602 | -1.25789471 |
| N  | 0.97514155 | 1.52362580 | -0.60170215 |
| H  | 0.66364007 | 1.58141427 | 0.44588588  |
| H  | 1.58304978 | 0.65003514 | -0.68941474 |
| H  | 0.05208269 | 1.31613475 | -1.15220526 |

Structure:  $\text{Re}(\text{NH}_3)_2^+$  ( $^7\text{A}$ )

CASPT2 Energy (Ha) = -189.87433348

Imaginary Frequencies = 0

|    | x          | y          | z           |
|----|------------|------------|-------------|
| N  | 2.46114039 | 4.76518892 | -0.78059577 |
| Re | 3.65599960 | 6.89803052 | -1.18937663 |
| H  | 2.16652505 | 4.74154967 | 0.24418170  |
| H  | 3.12840259 | 3.94577792 | -0.92837974 |
| H  | 1.58915058 | 4.57548306 | -1.36516633 |
| N  | 2.32068866 | 7.32964220 | -3.22691997 |
| H  | 1.68829136 | 8.21837288 | -3.10368150 |
| H  | 2.98493295 | 7.59789686 | -4.05811385 |
| H  | 1.67981781 | 6.55815095 | -3.59844893 |

Structure:  $\text{Re}(\text{NH}_3)_2^+$  ( $^5\text{A}$ )

CASPT2 Energy (Ha) = -189.91606727

Imaginary Frequencies = 0

|    | x          | y          | z           |
|----|------------|------------|-------------|
| N  | 1.19936936 | 4.32408968 | -2.37760410 |
| Re | 2.41161721 | 6.07565908 | -1.98635164 |
| H  | 0.26690495 | 4.58061316 | -2.81988703 |
| H  | 0.98397833 | 3.78396582 | -1.48715163 |
| H  | 1.68387288 | 3.64935619 | -3.04171193 |
| N  | 3.62789484 | 7.81906021 | -1.59269184 |
| H  | 3.86218274 | 7.94718871 | -0.56180317 |
| H  | 4.58258553 | 7.80088054 | -2.12261843 |
| H  | 3.15654316 | 8.74927961 | -1.91668126 |
